# Supplementary material for: The Alaska permanent fund dividend increases residential payments for water services
Source: Royal Society of Chemistry journal article supplement (doi:10.1039/d3va00219e), 2023-11-30
Supplement: d3va00219e1.pdf [file d3va00219e1.pdf]

Appendix

Supplementary Tables

Supplementary Table 1 - Selected Characteristics of ANCSA Regional Corporation

| ANCSA Region                                                                                                                                                                                                                                            | 2021            |                         |                             |             |
|---------------------------------------------------------------------------------------------------------------------------------------------------------------------------------------------------------------------------------------------------------|-----------------|-------------------------|-----------------------------|-------------|
|                                                                                                                                                                                                                                                         | Revenue         | Median Household Income | Households Without Plumbing | Population* |
| Ahtna                                                                                                                                                                                                                                                   | \$324,071,788   | \$65,387                | 12%                         | 2,846       |
| Aleut                                                                                                                                                                                                                                                   | \$231,893,388   | \$85,649                | 3%                          | 8,660       |
| ASRC                                                                                                                                                                                                                                                    | \$3,876,830,000 | \$83,992                | 11%                         | 10,865      |
| BSNC                                                                                                                                                                                                                                                    | \$468,215,000   | \$63,977                | 24%                         | 1,070       |
| BBNC                                                                                                                                                                                                                                                    | \$2,162,939,000 | \$61,250                | 11%                         | 6,618       |
| Calista                                                                                                                                                                                                                                                 | \$722,630,000   | \$51,300                | 29%                         | 26,868      |
| Chugach                                                                                                                                                                                                                                                 | \$783,000,000   | \$75,469                | 2%                          | 11,582      |
| CIRI                                                                                                                                                                                                                                                    | \$611,749,000   | \$84,061                | 2%                          | 453,589     |
| Doyon                                                                                                                                                                                                                                                   | \$283,000,000   | \$75,262                | 7%                          | 111,430     |
| Koniag                                                                                                                                                                                                                                                  | \$464,068,000   | \$83,765                | 0.2%                        | 13,218      |
| NANA                                                                                                                                                                                                                                                    | \$1,769,700,000 | \$68,654                | 20%                         | 7,776       |
| Sealaska                                                                                                                                                                                                                                                | \$697,000,000** | \$78,789                | 2%                          | 70,984      |
| Alaska                                                                                                                                                                                                                                                  | -               | \$80,287                | 3.6%                        | 735,951     |
| Sources: AlaskaBusiness 2022, 2021 ACS 5-Year Estimates B25049, S1901, B01003<br>* Population living in the region of the ANCSA corporation including non-shareholders<br>**2020 Revenue from Annual Report. Information on 2021 revenue is unavailable |                 |                         |                             |             |

**Supplementary Table 2** - Complete results of Fixed Effects estimates with standard errors and non-significant coefficients

| What impacts differences in Residential Payments within Villages? | <u>Variation</u>           |                            |                             | <u>ANCSA-Corporation Dividend</u> |                            |                             | <u>CDQ</u>                 |                             |
|-------------------------------------------------------------------|----------------------------|----------------------------|-----------------------------|-----------------------------------|----------------------------|-----------------------------|----------------------------|-----------------------------|
|                                                                   | (1)<br>Combined            | (2)<br>Low                 | (3)<br>High                 | (4)<br>April                      | (5)<br>Feb, June, Dec      | (6)<br>March & Sep, Dec     | (7)<br>Non-CDQ             | (8)<br>CDQ                  |
| <b>Month (Base = Oct)</b>                                         |                            |                            |                             |                                   |                            |                             |                            |                             |
| January                                                           | -7,210.29***<br>(977.42)   | -2,503.48**<br>(1,142.88)  | -12,056.36***<br>(1,139.46) | -5,221.93***<br>(941.48)          | -8,832.34***<br>(1,742.24) | -14,799.47***<br>(2,274.81) | -5,651.47***<br>(1,190.33) | -11,691.02***<br>(1,492.15) |
| February                                                          | -5,403.81***<br>(1,123.12) | -2,474.21**<br>(1,145.51)  | -8,330.14***<br>(1,319.43)  | -5,472.74***<br>(874.74)          | -6,706.68***<br>(2,149.87) | -9,248.26***<br>(2,278.02)  | -4,449.82***<br>(1,346.10) | -8,425.25***<br>(1,241.41)  |
| March                                                             | -4,645.08***<br>(1,135.95) | -2,532.94**<br>(1,140.82)  | -7,371.76***<br>(1,392.58)  | -3,718.82***<br>(914.33)          | -7,537.74***<br>(1,965.79) | -8,447.74**<br>(3,218.06)   | -4,975.17***<br>(1,300.01) | -6,350.37**<br>(2,566.55)   |
| April                                                             | -6,291.85***<br>(813.27)   | -3,889.64***<br>(903.59)   | -8,994.70***<br>(846.21)    | -4,444.29***<br>(677.81)          | -7,161.39***<br>(1,492.67) | -12,077.63***<br>(1,638.34) | -5,185.84***<br>(1,066.51) | -9,467.80***<br>(1,150.68)  |
| May                                                               | -7,456.35***<br>(735.61)   | -4,627.87***<br>(877.86)   | -10,786.18***<br>(823.15)   | -6,352.41***<br>(783.26)          | -6,708.74***<br>(1,420.94) | -12,516.61***<br>(1,402.35) | -4,990.62***<br>(945.35)   | -12,305.77***<br>(1,115.37) |
| June                                                              | -6,768.12***<br>(734.33)   | -4,143.52***<br>(847.13)   | -9,750.12***<br>(787.47)    | -6,452.40***<br>(607.06)          | -4,688.27***<br>(1,681.41) | -10,178.69***<br>(1,715.72) | -4,297.89***<br>(1,088.96) | -11,158.17***<br>(770.02)   |
| July                                                              | -6,096.36***<br>(804.61)   | -4,248.98***<br>(1,092.46) | -7,557.75***<br>(1,069.15)  | -5,166.73***<br>(824.29)          | -4,400.36**<br>(1,873.97)  | -6,233.08***<br>(2,341.35)  | -3,753.04***<br>(1,095.48) | -8,107.10***<br>(1,400.52)  |
| August                                                            | -6,540.13***<br>(796.36)   | -4,405.28***<br>(925.80)   | -8,007.79***<br>(1,047.66)  | -5,451.65***<br>(871.88)          | -4,898.85***<br>(1,216.05) | -7,298.68***<br>(2,377.87)  | -4,212.18***<br>(877.42)   | -8,245.85***<br>(1,547.69)  |
| September                                                         | -6,477.64***<br>(943.79)   | -4,703.00***<br>(1,126.33) | -8,007.68***<br>(882.43)    | -5,423.59***<br>(665.54)          | -6,351.39***<br>(2,073.22) | -7,062.01***<br>(2,032.10)  | -4,575.36***<br>(1,382.52) | -8,089.37***<br>(1,226.38)  |



|                         |                  |                   |                    |                     |                     |                     |                     |                    |
|-------------------------|------------------|-------------------|--------------------|---------------------|---------------------|---------------------|---------------------|--------------------|
| Households (H)          | 12.27<br>(22.54) | -5.14<br>(46.09)  | -40.99<br>(36.48)  | 22.86<br>(57.72)    | -81.25**<br>(37.91) | -61.57<br>(53.23)   | -65.74**<br>(27.45) | -75.97<br>(56.97)  |
| Household Wage<br>(HW)  | -0.01<br>(0.40)  | 0.84**<br>(0.40)  | -3.12***<br>(1.07) | -2.96*<br>(1.50)    | 1.16***<br>(0.41)   | -5.68***<br>(2.08)  | 0.56*<br>(0.32)     | -6.50***<br>(1.97) |
| Temperature (T)         | 18.18<br>(43.24) | 82.20*<br>(43.02) | -53.61<br>(58.93)  | 111.27**<br>(46.10) | -107.16<br>(74.68)  | -193.43<br>(146.25) | -37.20<br>(42.69)   | 31.63<br>(91.57)   |
| Prob > F                | 0.000            | 0.000             | 0.000              | 0.000               | 0.000               | 0.000               | 0.000               | 0.000              |
| Within-R <sup>2</sup>   | 0.2006           | 0.2029            | 0.3056             | 0.2731              | 0.3431              | 0.2491              | 0.2499              | 0.2941             |
| Observations            | 1020             | 510               | 510                | 444                 | 336                 | 240                 | 636                 | 384                |
| Villages                | 18               | 9                 | 9                  | 8                   | 6                   | 4                   | 11                  | 7                  |
| *** 0.01, ** 0.05, *0.1 |                  |                   |                    |                     |                     |                     |                     |                    |

**Supplementary Table 3** –Fixed Effects estimates with standard errors and non-significant coefficients of delinquency rates by customer type

| Delinquency Rate   |                   |                  |                |
|--------------------|-------------------|------------------|----------------|
|                    | Residential       | Commercial       | School         |
| Month (Base = Oct) |                   |                  |                |
| January            | 0.56***<br>(0.07) | 0.74<br>(0.58)   | 2.50<br>(1.94) |
| February           | 0.47***<br>(0.06) | 1.38**<br>(0.53) | 2.67<br>(1.94) |
| March              | 0.42***<br>(0.06) | 1.05*<br>(0.54)  | 2.34<br>(1.95) |

|                           |           |         |         |        |
|---------------------------|-----------|---------|---------|--------|
|                           | April     | 0.49*** | 0.72    | 2.48   |
|                           |           | (0.07)  | (0.67)  | (1.94) |
|                           | May       | 0.55*** | 1.37**  | 2.50   |
|                           |           | (0.08)  | (0.53)  | (1.95) |
|                           | June      | 0.50*** | 0.86    | 0.91   |
|                           |           | (0.06)  | (0.60)  | (2.03) |
|                           | July      | 0.46*** | 1.02*   | 2.44   |
|                           |           | (0.06)  | (0.55)  | (2.02) |
|                           | August    | 0.49*** | 1.14*   | 2.76   |
|                           |           | (0.07)  | (0.61)  | (2.01) |
|                           | September | 0.52*** | 1.32**  | 2.42   |
|                           |           | (0.07)  | (0.61)  | (2.11) |
|                           | November  | 0.53*** | 1.21*   | 2.49   |
|                           |           | (0.09)  | (0.64)  | (2.12) |
|                           | December  | 0.54*** | 1.10**  | 2.00   |
|                           |           | (0.06)  | (0.52)  | (1.89) |
| <b>Year (Base = 2012)</b> |           |         |         |        |
|                           | 2013      | -0.04   | 0.12    | 0.02   |
|                           |           | (0.03)  | (0.18)  | (0.37) |
|                           | 2014      | 0.00    | 0.00    | 0.05   |
|                           |           | (0.03)  | (0.18)  | (0.33) |
|                           | 2015      | 0.01    | 0.39*** | 0.14   |
|                           |           | (0.03)  | (0.13)  | (0.35) |

|                         |        |        |        |
|-------------------------|--------|--------|--------|
| 2016                    | 0.05*  | 0.32** | -1.05  |
|                         | (0.03) | (0.15) | (0.77) |
| Prob > F                | 0.0000 | 0.0000 | 0.0004 |
| Within-R <sup>2</sup>   | 0.1528 | 0.0241 | 0.0197 |
| *** 0.01, ** 0.05, *0.1 |        |        |        |

We estimate fixed effects for residential, commercial, and school delinquency rates. We calculate delinquency rates by subtracting from one the quotient of payments received over the amount billed. We explore the monthly variations in these rates by using the following approach:

$$(1) \text{Delinquency}_{it} = \beta_0 + \beta_1 M_{it} + \beta_2 Y_{it} + a_i + \mu_{it}$$

Where i denotes village, t is the time period, M month and Y is year. Estimates for each customer group are estimated in separate models.

**Supplementary Table 4** - Complete results of Random Effects estimates with standard errors and non-significant coefficients

| What impacts differences in Residential Payments between Villages? | <u>Variation</u> |            |             | <u>ANCSA-Corporation Dividend</u> |                       |                         | <u>CDQ</u>     |            |
|--------------------------------------------------------------------|------------------|------------|-------------|-----------------------------------|-----------------------|-------------------------|----------------|------------|
|                                                                    | (1)<br>Combined  | (2)<br>Low | (3)<br>High | (4)<br>April                      | (5)<br>Feb, June, Dec | (6)<br>March & Sep, Dec | (7)<br>Non-CDQ | (8)<br>CDQ |

| Month (Base = Oct) |              |              |               |              |              |               |              |               |
|--------------------|--------------|--------------|---------------|--------------|--------------|---------------|--------------|---------------|
| January            | -7,252.13*** | -3,850.14*** | -11,756.08*** | -5,372.74*** | -9,286.26*** | -12,878.01*** | -6,145.82*** | -11,046.28*** |
|                    | (983.31)     | (1,197.10)   | (983.15)      | (1,075.20)   | (2,074.77)   | (1,928.24)    | (1,256.93)   | (1,279.43)    |
| February           | -5,434.70*** | -3,812.37*** | -8,165.07***  | -5,548.25*** | -7,037.34*** | -7,060.98***  | -4,845.62*** | -7,770.80***  |
|                    | (1,121.03)   | (1,177.90)   | (1,265.63)    | (877.07)     | (2,474.56)   | (2,217.81)    | (1,383.38)   | (1,215.84)    |
| March              | -4,629.97*** | -3,545.10*** | -6,699.34***  | -3,922.68*** | -7,871.91*** | -6,676.32**   | -5,360.50*** | -5,687.80**   |
|                    | (1,119.53)   | (1,059.00)   | (1,344.85)    | (952.76)     | (2,021.36)   | (2,953.89)    | (1,320.19)   | (2,405.32)    |
| April              | -6,259.22*** | -4,697.93*** | -8,421.57***  | -4,487.32*** | -7,543.25*** | -10401.12***  | -5,502.53*** | -8,760.54***  |
|                    | (798.41)     | (910.94)     | (829.11)      | (692.61)     | (1,530.53)   | (1,563.49)    | (1,112.26)   | (946.32)      |
| May                | -7,366.50*** | -5,023.65*** | -9,993.02***  | -6,242.76*** | -6,923.52*** | -11058.87***  | -5,022.56*** | -11,544.73*** |
|                    | (727.40)     | (875.09)     | (807.73)      | (722.32)     | (1,419.47)   | (1,458.00)    | (987.11)     | (1,031.52)    |
| June               | -6,631.72*** | -4,223.78*** | -8,704.63***  | -6,192.39*** | -4,772.91*** | -9,074.15***  | -4,213.09*** | -10,378.06*** |
|                    | (711.69)     | (900.96)     | (735.65)      | (596.98)     | (1,718.07)   | (1,724.40)    | (1,037.43)   | (802.82)      |
| July               | -6,155.61*** | -3,578.98*** | -8,598.77***  | -5,458.17*** | -4,632.84**  | -7,318.33***  | -3,528.13*** | -9,801.64***  |
|                    | (810.69)     | (1,232.13)   | (1,025.90)    | (625.12)     | (1,986.47)   | (2,263.42)    | (1,110.67)   | (1,151.45)    |
| August             | -6,598.23*** | -3,771.44*** | -9,045.96***  | -5,688.09*** | -4,956.89*** | -8,434.19***  | -3,899.11*** | -9,795.10***  |
|                    | (774.62)     | (734.81)     | (978.30)      | (627.71)     | (1,267.83)   | (2,268.01)    | (835.92)     | (1,302.28)    |
| September          | -6,569.24*** | -4,183.35*** | -9,065.26***  | -5,636.06*** | -6,692.76*** | -7,908.42***  | -4,407.47*** | -9,565.16***  |
|                    | (948.67)     | (1,059.42)   | (850.43)      | (432.34)     | (1,960.28)   | (1,999.48)    | (1,358.98)   | (993.10)      |
| November           | -6,779.93*** | -3,278.99**  | -10,516.14*** | -4,766.58*** | -8,536.51*** | -11,050.86*** | -5,644.10*** | -9,594.68***  |
|                    | (1,289.75)   | (1,368.78)   | (1,158.49)    | (988.64)     | (2,480.10)   | (1,532.24)    | (1,534.28)   | (1,237.86)    |
| December           | -7,118.41*** | -4,696.79*** | -10,370.32*** | -5,388.82*** | -9,985.37*** | -11,033.96*** | -6,368.74*** | -10096.61***  |
|                    | (975.08)     | (1,225.85)   | (740.18)      | (1,072.52)   | (2,153.66)   | (1,929.16)    | (1,353.10)   | (1,253.73)    |

| Year (Base = 2012)             |             |             |            |            |             |            |             |          |  |
|--------------------------------|-------------|-------------|------------|------------|-------------|------------|-------------|----------|--|
| 2013                           | 1,156.38**  | 1,496.26**  | 1,469.24** | 1,037.86** | 3,476.94*** | -697.50    | 1,744.11**  | 229.86   |  |
|                                | (520.46)    | (659.54)    | (624.59)   | (443.69)   | (1,065.57)  | (883.66)   | (657.46)    | (501.01) |  |
| 2014                           | 1,800.48*** | 2,522.45*** | 1,513.32** | 922.29*    | 4,575.61*** | -619.85    | 2,412.83*** | 612.81   |  |
|                                | (447.28)    | (587.53)    | (617.82)   | (465.49)   | (1,249.90)  | (842.51)   | (560.29)    | (747.97) |  |
| 2015                           | 652.36      | 1,102.04    | 511.89     | 616.07     | 1,565.61    | -2,172.55* | 445.87      | 336.23   |  |
|                                | (497.82)    | (698.48)    | (590.32)   | (425.31)   | (1,135.24)  | (1,227.51) | (638.57)    | (630.84) |  |
| 2016                           | 600.98      | 1,275.51**  | 550.26     | 274.82     | 2,042.43*   | -2,357.82* | 893.95*     | 138.36   |  |
|                                | (418.28)    | (629.18)    | (607.78)   | (460.29)   | (1,104.26)  | (1,291.54) | (508.16)    | (711.89) |  |
| <b>Public Utilities</b>        |             |             |            |            |             |            |             |          |  |
| Residential (P)                | 29.03***    | 33.38***    | 35.44***   | 19.22***   | 16.59***    | 58.67***   | 28.61***    | 53.43*** |  |
|                                | (8.47)      | (4.75)      | (4.75)     | (4.67)     | (5.02)      | (11.45)    | (3.34)      | (4.82)   |  |
| School Pay (S)                 | 0.31***     | 0.46***     | 0.13**     | 0.05       | 0.76***     | 0.15       | 0.61***     | -0.03    |  |
|                                | (0.06)      | (0.11)      | (0.05)     | (0.04)     | (0.21)      | (0.13)     | (0.12)      | (0.06)   |  |
| Commercial (C)                 | 0.04**      | 0.03        | 0.08**     | -0.02      | 0.13*       | 0.06       | 0.09**      | 0.04     |  |
|                                | (0.02)      | (0.03)      | (0.04)     | (0.03)     | (0.08)      | (0.04)     | (0.04)      | (0.03)   |  |
| Electr. Cost (E <sub>c</sub> ) | 4.83        | 5.14        | 11.64**    | 15.14***   | 5.19        | -18.57**   | 2.71        | 9.23     |  |
|                                | (3.77)      | (4.62)      | (5.30)     | (5.44)     | (4.38)      | (7.19)     | (3.57)      | (6.50)   |  |
| <b>SocioEcon</b>               |             |             |            |            |             |            |             |          |  |
| Households (H)                 | 62.02***    | 83.17***    | 116.40***  | 118.24***  | 103.30***   | 86.82***   | 90.68***    | 94.93*** |  |
|                                | (20.76)     | (9.62)      | (6.95)     | (5.19)     | (16.42)     | (17.68)    | (12.96)     | (8.11)   |  |
| Household Wage (HW)            | 15.32       | 42.88       | -45.78     | 75.71      | -101.61     | -181.21    | -46.73      | 25.50    |  |
|                                | (42.25)     | (40.95)     | (56.61)    | (50.23)    | (87.01)     | (137.28)   | (38.75)     | (94.42)  |  |



|                         |                  |                   |                   |                     |                    |                     |                   |                  |
|-------------------------|------------------|-------------------|-------------------|---------------------|--------------------|---------------------|-------------------|------------------|
| Temperature (T)         | 18.18<br>(43.24) | 82.20*<br>(43.02) | -53.61<br>(58.93) | 111.27**<br>(46.10) | -107.16<br>(74.68) | -193.43<br>(146.25) | -37.20<br>(42.69) | 31.63<br>(91.57) |
| Prob > F                | 0.000            | 0.000             | 0.000             | 0.000               | 0.000              | 0.000               | 0.000             | 0.000            |
| Overall-R <sup>2</sup>  | 0.5192           | 0.5436            | 0.5663            | 0.5605              | 0.6352             | 0.4957              | 0.6255            | 0.4614           |
| Observations            | 1,020            | 510               | 510               | 444                 | 336                | 240                 | 636               | 384              |
| Villages                | 18               | 9                 | 9                 | 8                   | 6                  | 4                   | 11                | 7                |
| *** 0.01, ** 0.05, *0.1 |                  |                   |                   |                     |                    |                     |                   |                  |

**Supplementary Table 5** – Result of linear regression investigating the seasonality of household wages

| How do household wages vary over time? | <u>Variation</u> |            |             | <u>ANCSA-Corporations Dividend</u> |                       |                            | <u>CDQ</u>     |            |
|----------------------------------------|------------------|------------|-------------|------------------------------------|-----------------------|----------------------------|----------------|------------|
|                                        | (1)<br>Combined  | (2)<br>Low | (3)<br>High | (4)<br>April                       | (5)<br>Feb, June, Dec | (6)<br>March & Sep,<br>Dec | (7)<br>Non-CDQ | (8)<br>CDQ |
| <b>Month (Base = Jan)</b>              |                  |            |             |                                    |                       |                            |                |            |
| February                               | -11.70           | -12.22     | -11.19      | -9.87                              | -15.09                | -10.26                     | -12.20         | -10.85     |
|                                        | (135.07)         | (236.71)   | (130.75)    | (177.45)                           | (197.21)              | (152.91)                   | (195.98)       | (146.52)   |
| March                                  | -25.96           | -26.59     | -25.34      | -22.14                             | -32.96                | -23.05                     | -26.84         | -24.47     |
|                                        | (135.07)         | (236.71)   | (130.75)    | (177.45)                           | (197.21)              | (152.91)                   | (195.98)       | (146.52)   |
| April                                  | -26.28           | -27.03     | -25.52      | -21.97                             | -33.56                | -23.82                     | -27.41         | -24.33     |
|                                        | (135.07)         | (236.71)   | (130.75)    | (177.45)                           | (197.21)              | (152.91)                   | (195.98)       | (146.52)   |
| May                                    | -39.43           | -40.12     | -38.74      | -34.46                             | -49.30                | -34.54                     | -40.21         | -38.10     |
|                                        | (135.07)         | (236.71)   | (130.75)    | (177.45)                           | (197.21)              | (152.91)                   | (195.98)       | (146.52)   |
| June                                   | -44.68           | -45.57     | -43.78      | -39.38                             | -55.73                | -38.75                     | -45.38         | -43.48     |
|                                        | (135.07)         | (236.71)   | (130.75)    | (177.45)                           | (197.21)              | (152.91)                   | (195.98)       | (146.52)   |
| July                                   | 469.77***        | 502.20**   | 432.06***   | 439.13**                           | 561.71***             | 442.76***                  | 492.68**       | 441.40***  |
|                                        | (134.28)         | (235.35)   | (129.99)    | (175.12)                           | (197.21)              | (152.91)                   | (195.98)       | (144.31)   |
| August                                 | 466.95***        | 499.11**   | 429.52***   | 437.19**                           | 557.82***             | 439.77***                  | 489.58**       | 439.03***  |
|                                        | (134.28)         | (235.35)   | (129.99)    | (175.12)                           | (197.21)              | (152.91)                   | (195.98)       | (144.31)   |
| September                              | 477.18***        | 519.26**   | 425.21***   | 433.53**                           | 557.53***             | 435.50***                  | 505.20***      | 434.91***  |
|                                        | (133.90)         | (234.05)   | (129.99)    | (175.12)                           | (195.52)              | (152.91)                   | (195.08)       | (144.31)   |
| October                                | 199.47           | 218.02     | 173.55      | 167.29                             | 217.35                | 257.76*                    | 213.92         | 180.60     |
|                                        | (134.29)         | (235.40)   | (129.99)    | (175.12)                           | (197.26)              | (152.91)                   | (196.00)       | (144.31)   |

|                           |          |                       |                        |                      |                      |                        |                       |                        |                    |
|---------------------------|----------|-----------------------|------------------------|----------------------|----------------------|------------------------|-----------------------|------------------------|--------------------|
|                           | November | 208.87<br>(134.29)    | 227.80<br>(235.40)     | 182.56<br>(129.99)   | 175.25<br>(175.12)   | 229.37<br>(197.26)     | 266.23*<br>(152.91)   | 223.70<br>(196.00)     | 189.39<br>(144.31) |
|                           | December | 215.70<br>(134.29)    | 234.76<br>(235.40)     | 189.28<br>(129.99)   | 181.27<br>(175.12)   | 237.84<br>(197.26)     | 272.34*<br>(152.91)   | 230.67<br>(196.00)     | 196.01<br>(144.31) |
| <b>Year (Base = 2012)</b> |          |                       |                        |                      |                      |                        |                       |                        |                    |
|                           | 2013     | -95.30<br>(88.27)     | -175.66<br>(153.11)    | -28.28<br>(86.48)    | 257.34**<br>(118.41) | -454.02***<br>(126.82) | -259.86***<br>(98.70) | -189.41<br>(126.19)    | 84.22<br>(98.34)   |
|                           | 2014     | -298.98***<br>(87.65) | -518.49***<br>(153.11) | -77.69<br>(85.21)    | 269.40**<br>(116.47) | -969.78***<br>(126.82) | -349.88***<br>(98.70) | -476.39***<br>(126.19) | 33.19<br>(96.48)   |
|                           | 2015     | -268.11***<br>(87.37) | -357.82**<br>(154.21)  | -178.21**<br>(84.04) | 177.27<br>(114.80)   | -693.71***<br>(128.21) | -383.26***<br>(98.70) | -402.77***<br>(126.92) | -3.71<br>(94.92)   |
|                           | 2016     | -241.94***<br>(88.27) | -345.87**<br>(157.50)  | -132.90<br>(84.04)   | 158.83<br>(114.80)   | -378.70***<br>(132.65) | -510.58***<br>(98.70) | -318.65**<br>(129.20)  | -56.80<br>(94.92)  |
|                           | Prob > F | 0.000                 | 0.003                  | 0.000                | 0.004                | 0.000                  | 0.000                 | 0.000                  | 0.000              |
|                           | R²       | 0.0682                | 0.0666                 | 0.1016               | 0.0742               | 0.2426                 | 0.2374                | 0.0706                 | 0.1085             |
|                           | Villages | 18                    | 9                      | 9                    | 8                    | 6                      | 4                     | 11                     | 7                  |
| *** 0.01, ** 0.05, *0.1   |          |                       |                        |                      |                      |                        |                       |                        |                    |

## Supplementary Figures

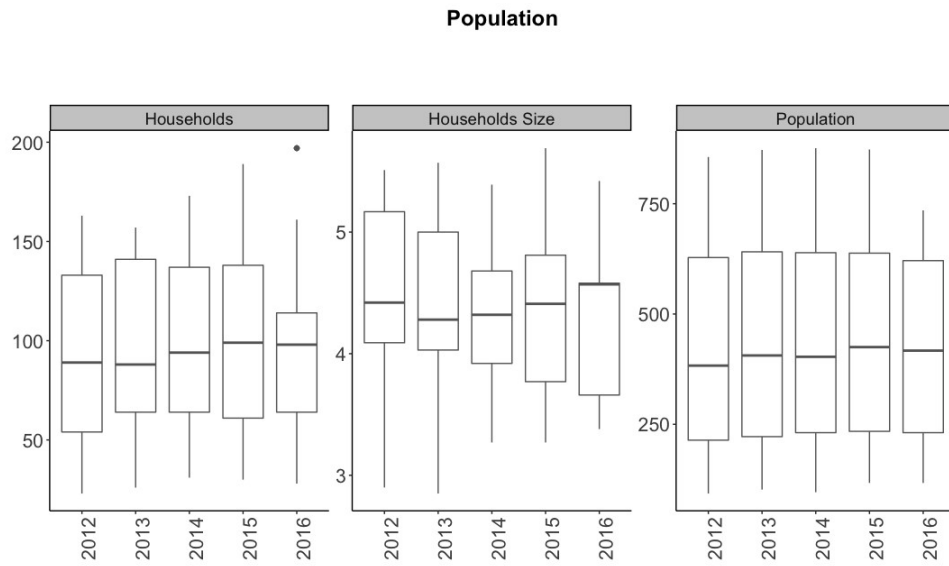

**Supplementary Figure 1** - Boxplots showing the number of households, household size, and population in the 18 villages in the panel data set from 2012 to 2016.

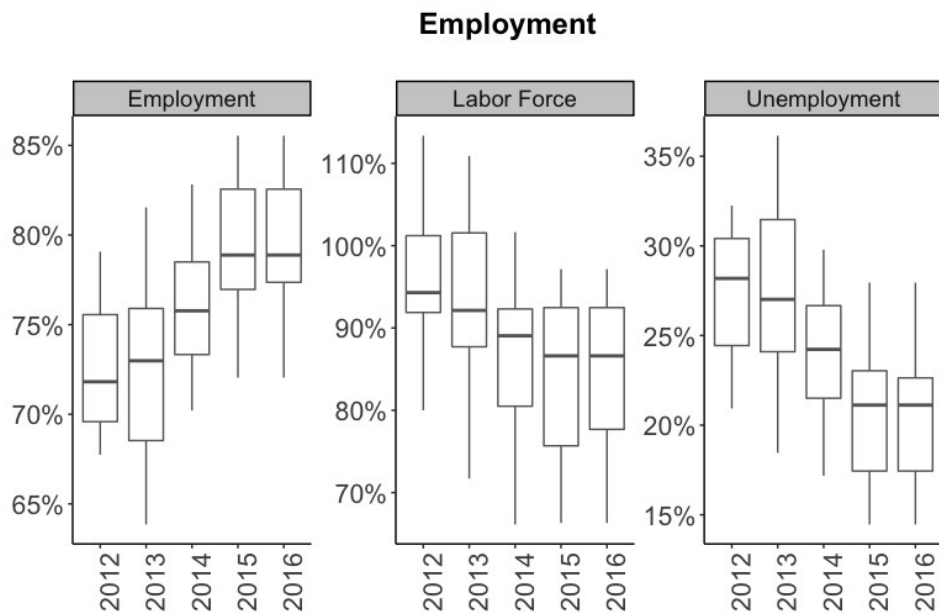

**Supplementary Figure 2** - Boxplots showing the employment, unemployment, and labor force participation rates in the 18 villages in the panel data set from 2012 to 2016.

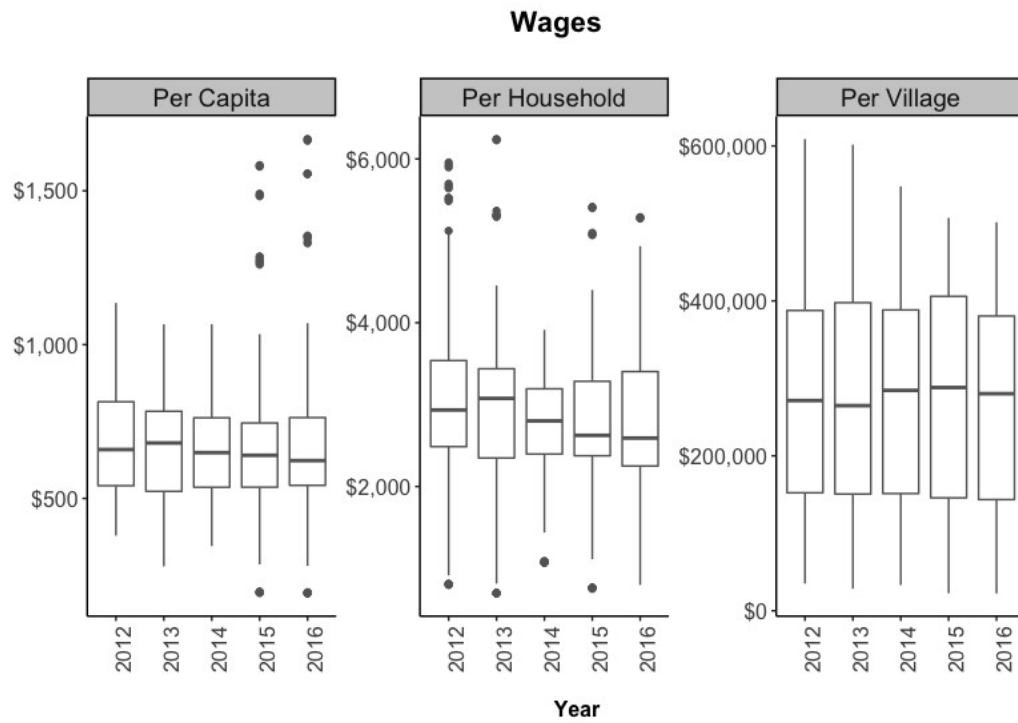

**Supplementary Figure 3** - Boxplots showing wages per capita, per household and per village in the 18 villages in the panel data set from 2012 to 2016.

### Water & Sewer - Residential

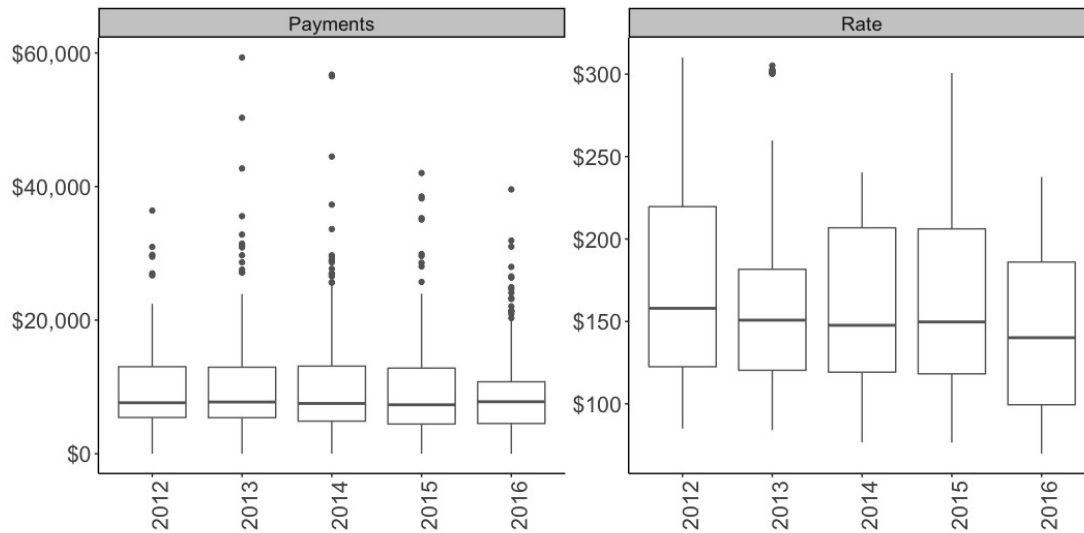

**Supplementary Figure 4** - Boxplots showing residential payments and residential rates for water utilities in the 18 villages in the panel data set from 2012 to 2016.

### Water and Sewer - Payments

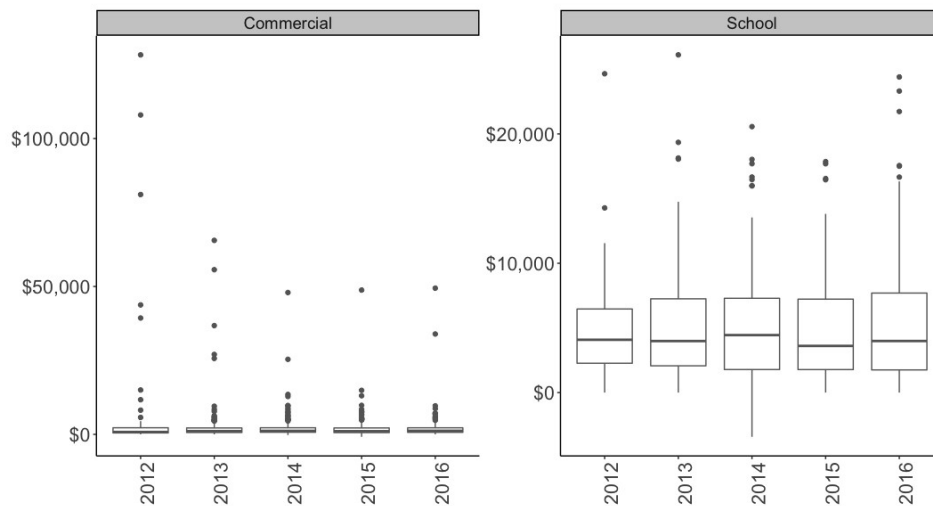

**Supplementary Figure 5** - Boxplots showing the commercial and school payments for water utilities in the 18 villages in the panel data set from 2012 to 2016.

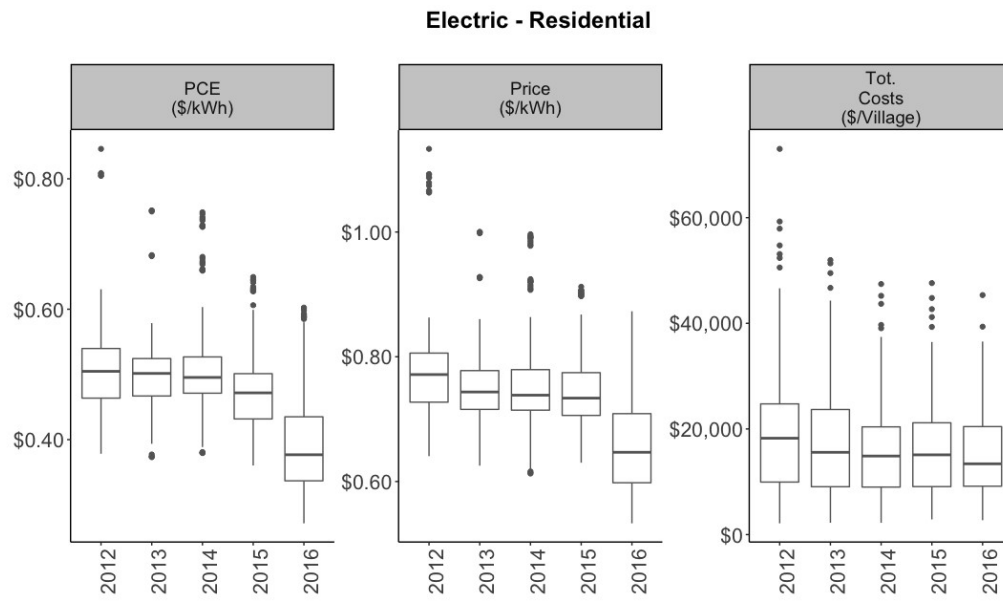

**Supplementary Figure 6** - Boxplots showing the subsidized electric rate (PCE), unsubsidized rate (Price) and total residential costs of electricity per village in the 18 villages in the panel data set from 2012 to 2016.

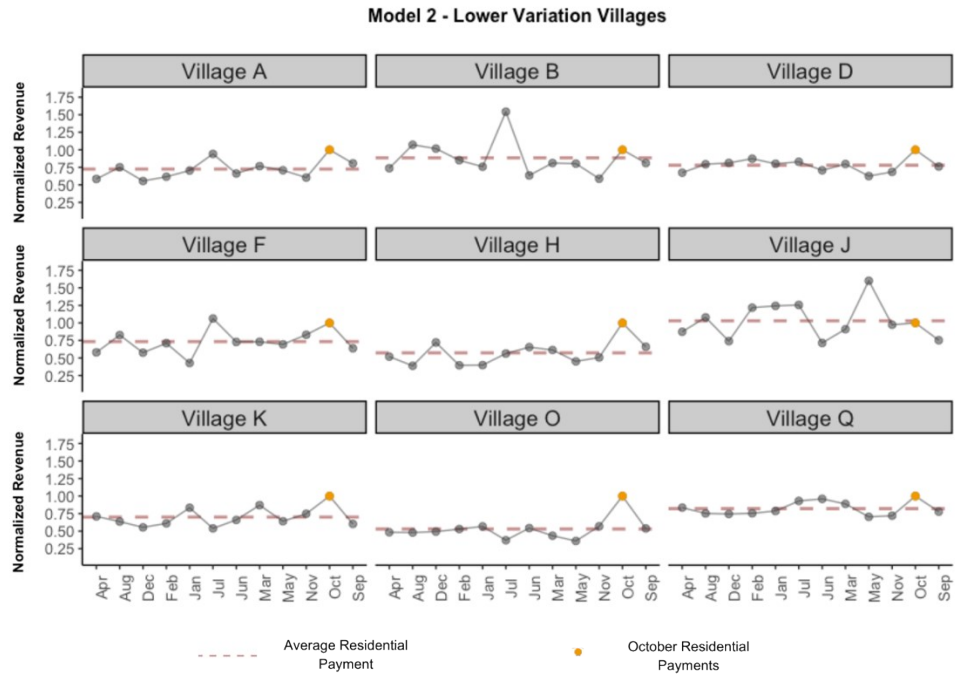

**Supplementary Figure 7** - Average monthly payment for each village in Model 2. The average monthly residential payments are divided by October payments to normalize the values. Revenue in October is always equal to 1.

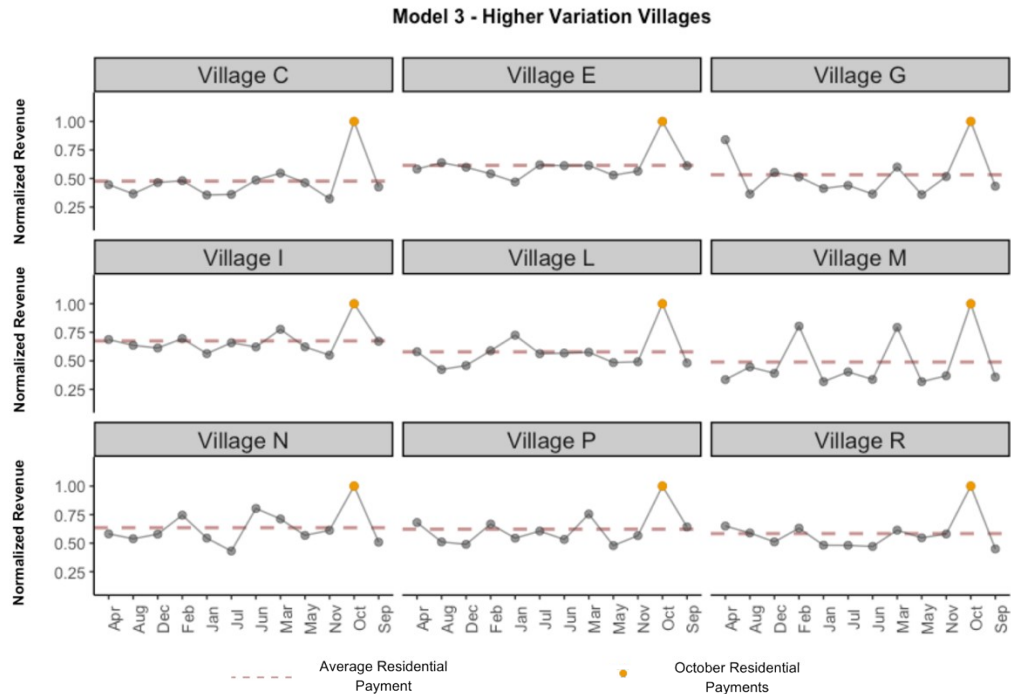

**Supplementary Figure 8** - Average monthly payment for each village in Model 3. The average monthly residential payments are divided by October payments to normalize the values. Revenue in October is always equal to 1.



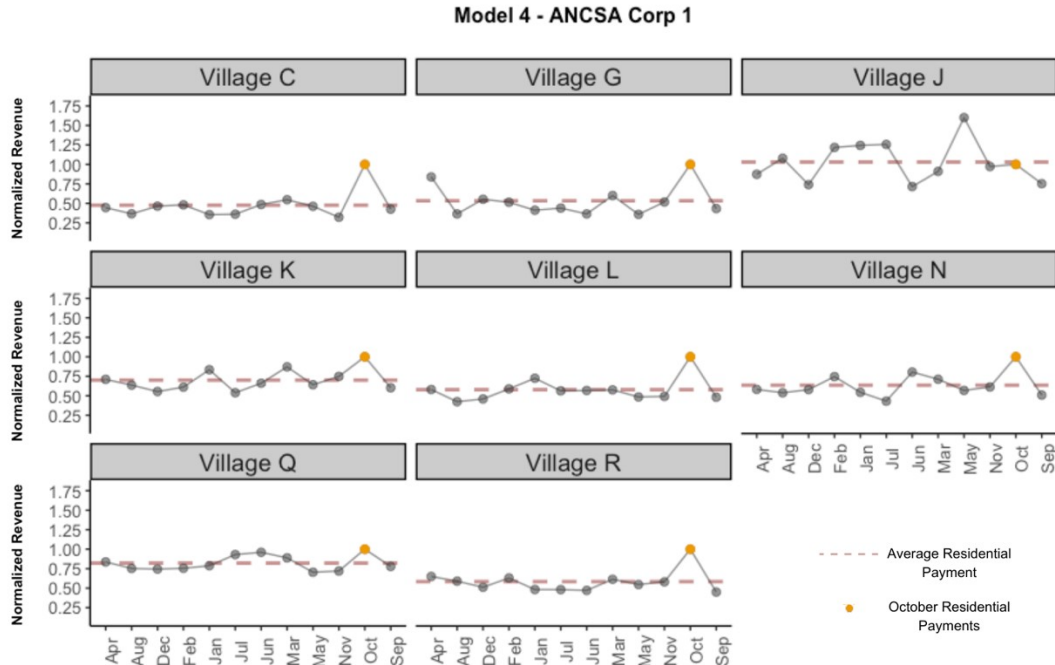

**Supplementary Figure 9** - Average monthly payment for each village in Model 4. The average monthly residential payments are divided by October payments to normalize the values. Revenue in October is always equal to 1.

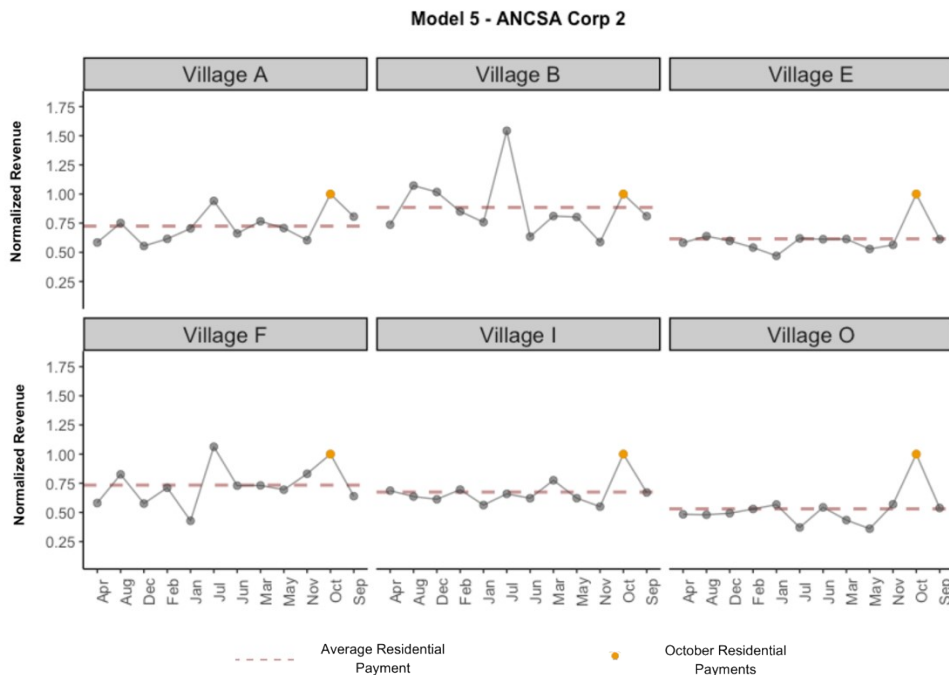

**Supplementary Figure 10** - Average monthly payment for each village in Model 5. The average monthly residential payments are divided by October payments to normalize the values. Revenue in October is always equal to 1.

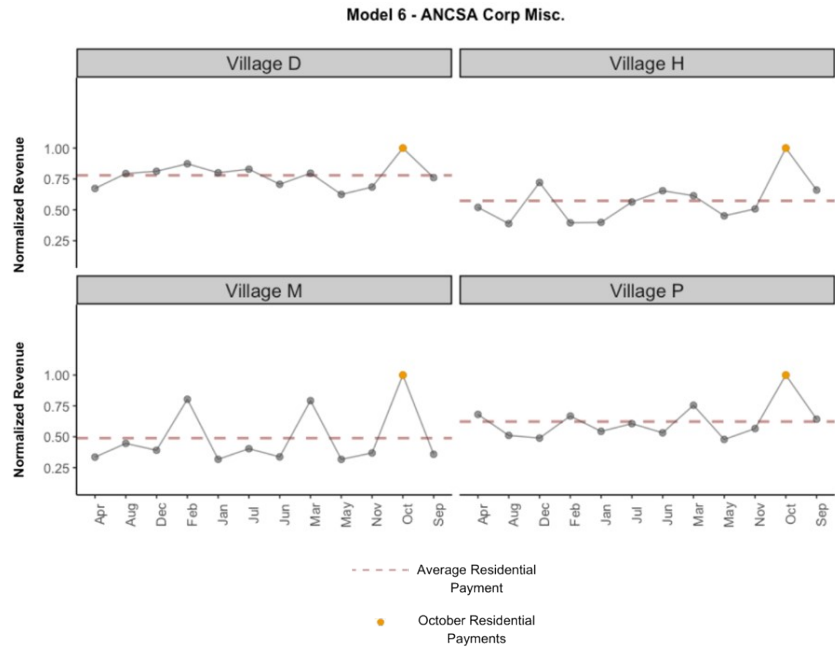

**Supplementary Figure 11** - Average monthly payment for each village in Model 6. The average monthly residential payments are divided by October payments to normalize the values. Revenue in October is always equal to 1.

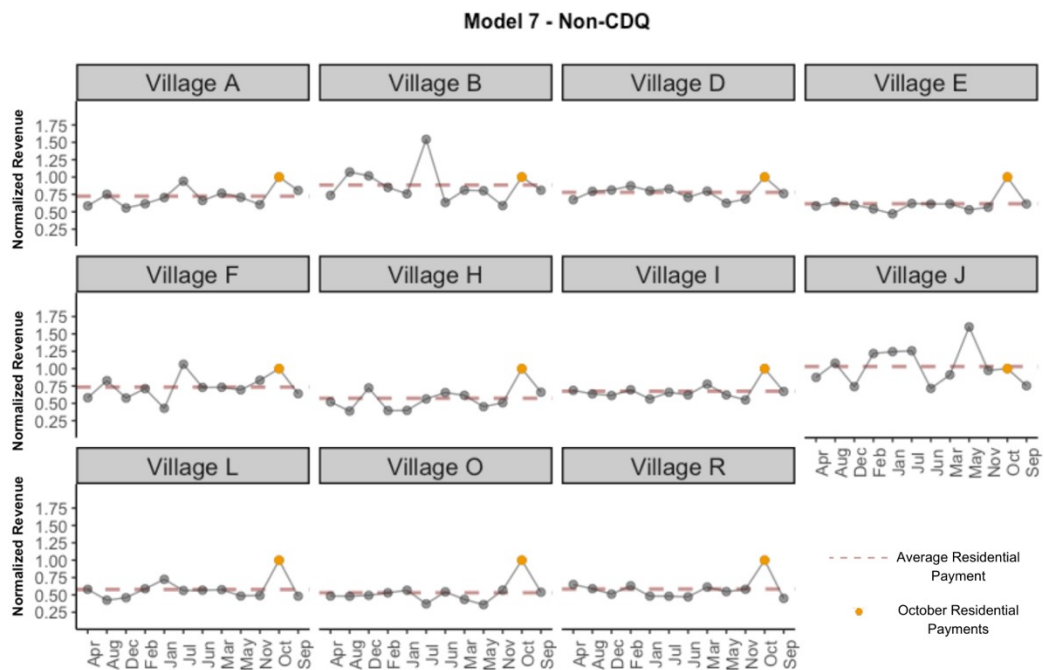

**Supplementary Figure 12** - Average monthly payment for each village in Model 7. The average monthly residential payments are divided by October payments to normalize the values. Revenue in October is always equal to 1.

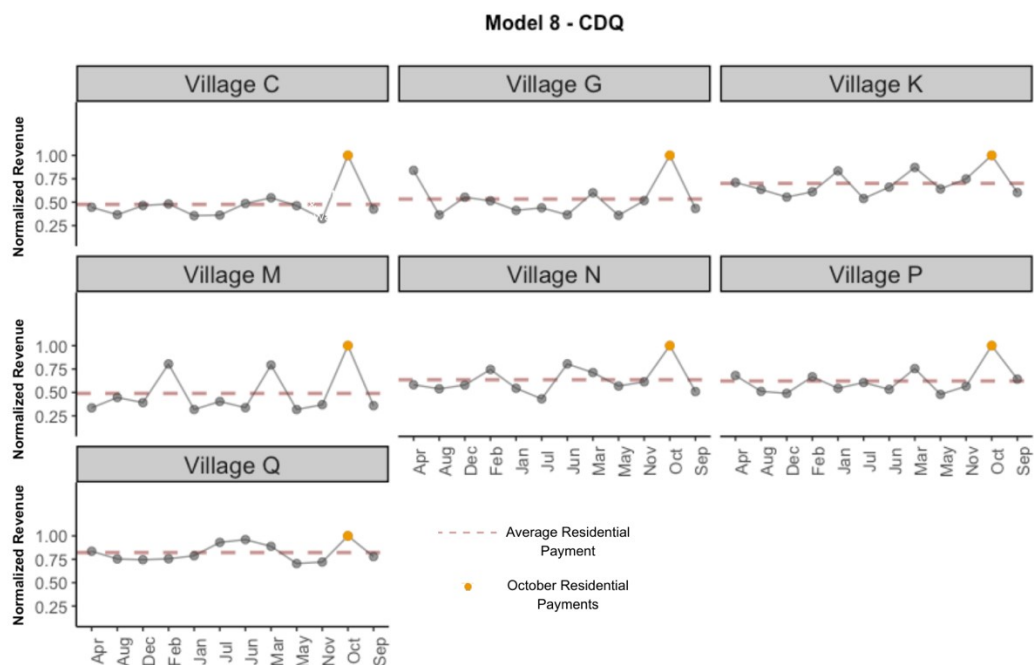

**Supplementary Figure 13** - Average monthly payment for each village in Model 8. The average monthly residential payments are divided by October payments to normalize the values. Revenue in October is always equal to 1.
